# Supplementary material for: Environmental Toxin Biliatresone-Induced Biliary Atresia-like Abnormal Cilia and Bile Duct Cell Development of Human Liver Organoids
Source: MDPI journal article supplement (doi:10.3390/toxins16030144), 2024-03-11
Supplement: s1 [file s1]

# Supplementary Materials: Environmental Toxin Biliatresone-Induced Biliary Atresia-like Abnormal Cilia and Bile Duct Cell Development of Human Liver Organoids

Yue Hai-Bing <sup>1</sup>, Menon Sudheer Sivasankaran <sup>1</sup>, Babu Rosana Ottakandathil <sup>1,†</sup>, Wu Zhong-Luan <sup>1</sup>, So Man-Ting <sup>1</sup>, Chung (Patrick) Ho-Yu <sup>1,2</sup>, Wong (Kenneth) Kak-Yuen <sup>1,2</sup>, Tam (Paul) Kwong-Hang <sup>1,2,3</sup> and Lui (Vincent) Chi-Hang <sup>1,2,\*</sup>

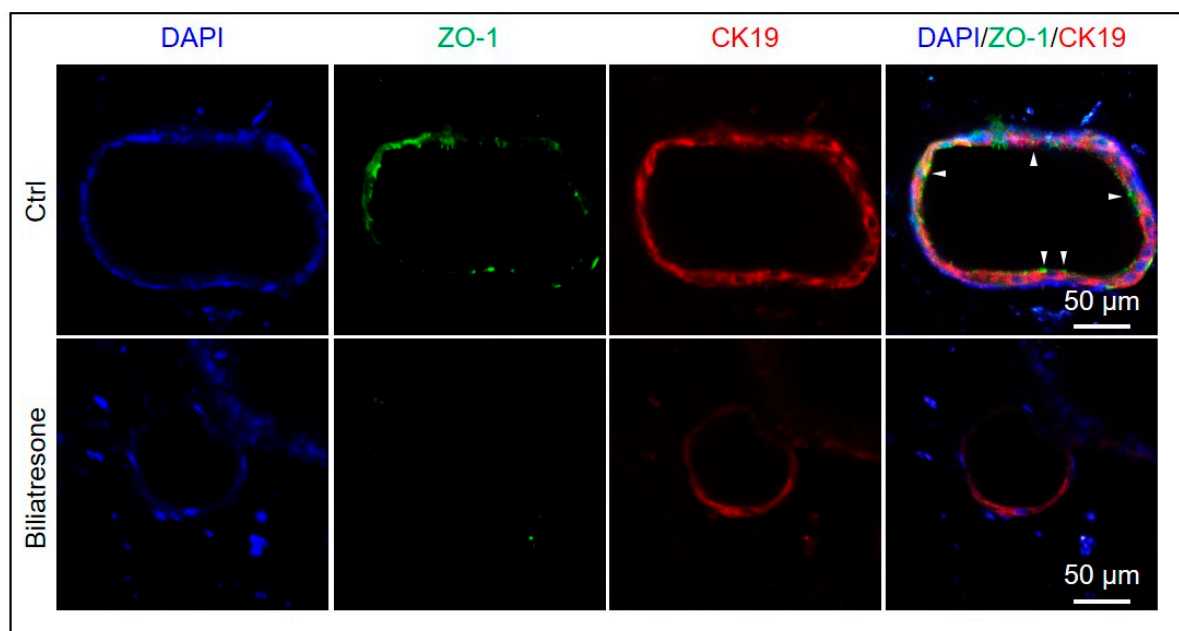

**Figure S1**

**Figure S1.** Immunostaining of control and day-2 biliatresone-treated human liver organoids for ZO-1 (green) and CK19 (red). Nuclei were stained with DAPI (blue).

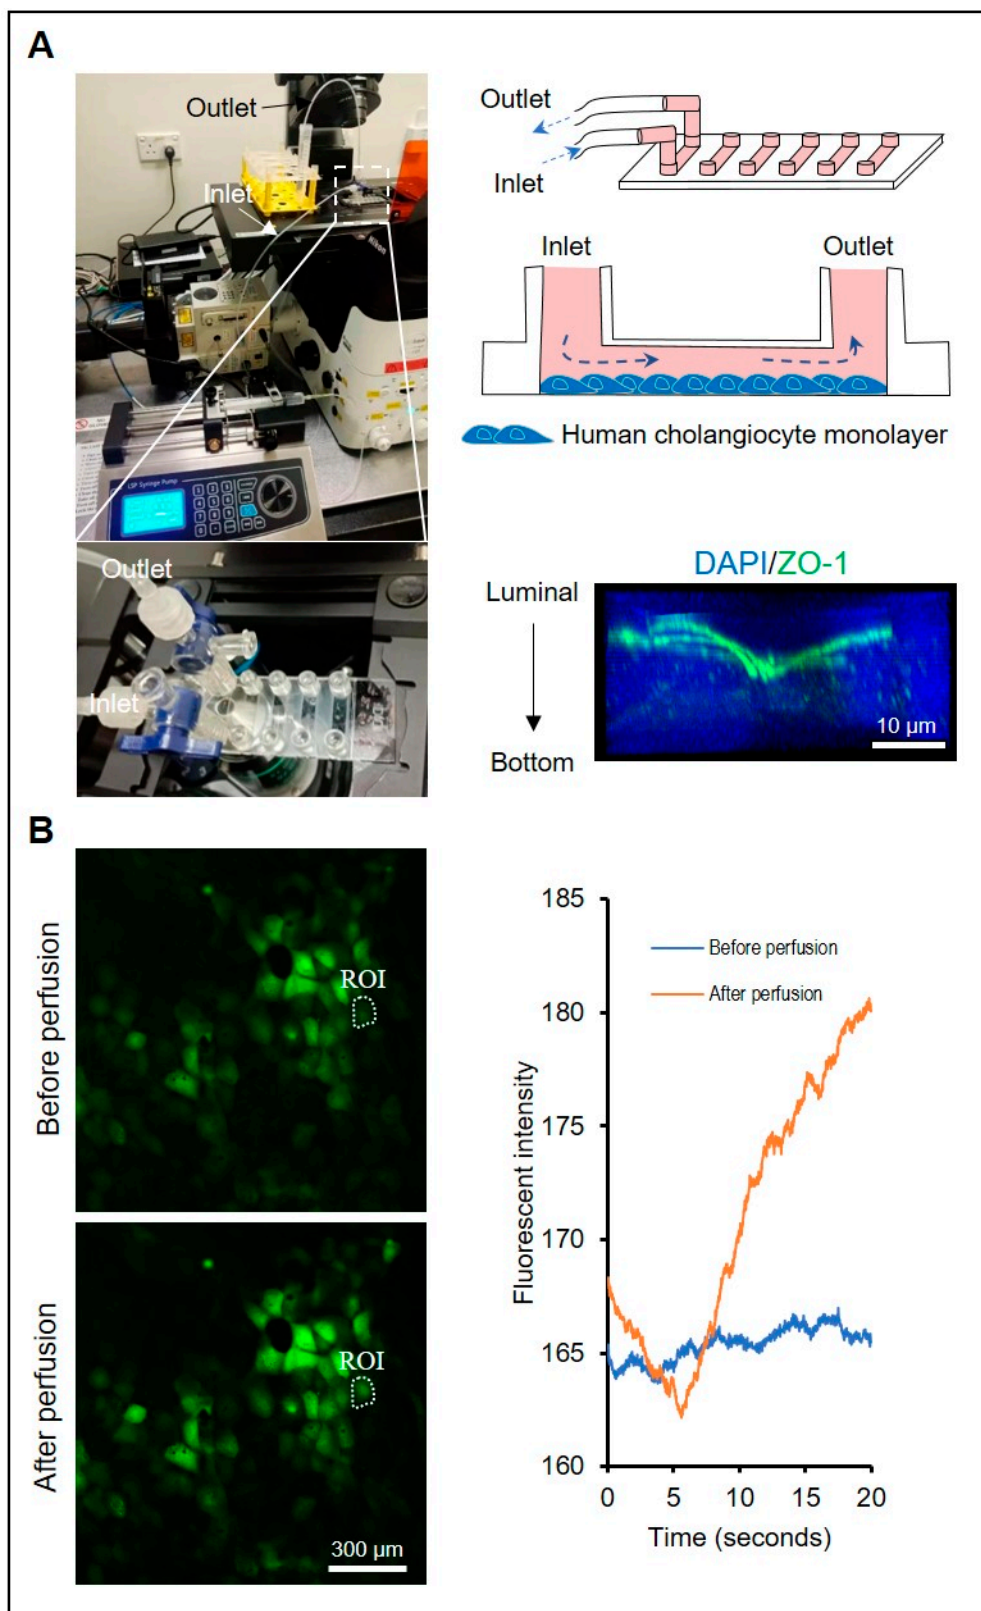

**Figure S2**

**Figure S2.** Setup of calcium signal evaluation of human cholangiocytes after perfusion stimulation. (A) Left panel, perfusion setup for the microfluidic chip mounted on the microscope. Boxed region was magnified and shown below. Right panel, diagram of the microfluidic chips with human cholangiocyte monolayer, and representative image of the cholangiocyte monolayer cultured in the channel of microfluidic chip immunostained for ZO-1 (green). Nuclei were stained with DAPI

(blue). (B) Left panel, representative images of cholangiocytes stained with Calbryte 520 before and after perfusion stimulation. Right panel, plot profile of fluorescent intensity changes of highlighted region (ROI: gion of interest) for 20 seconds after perfusion stimulation.

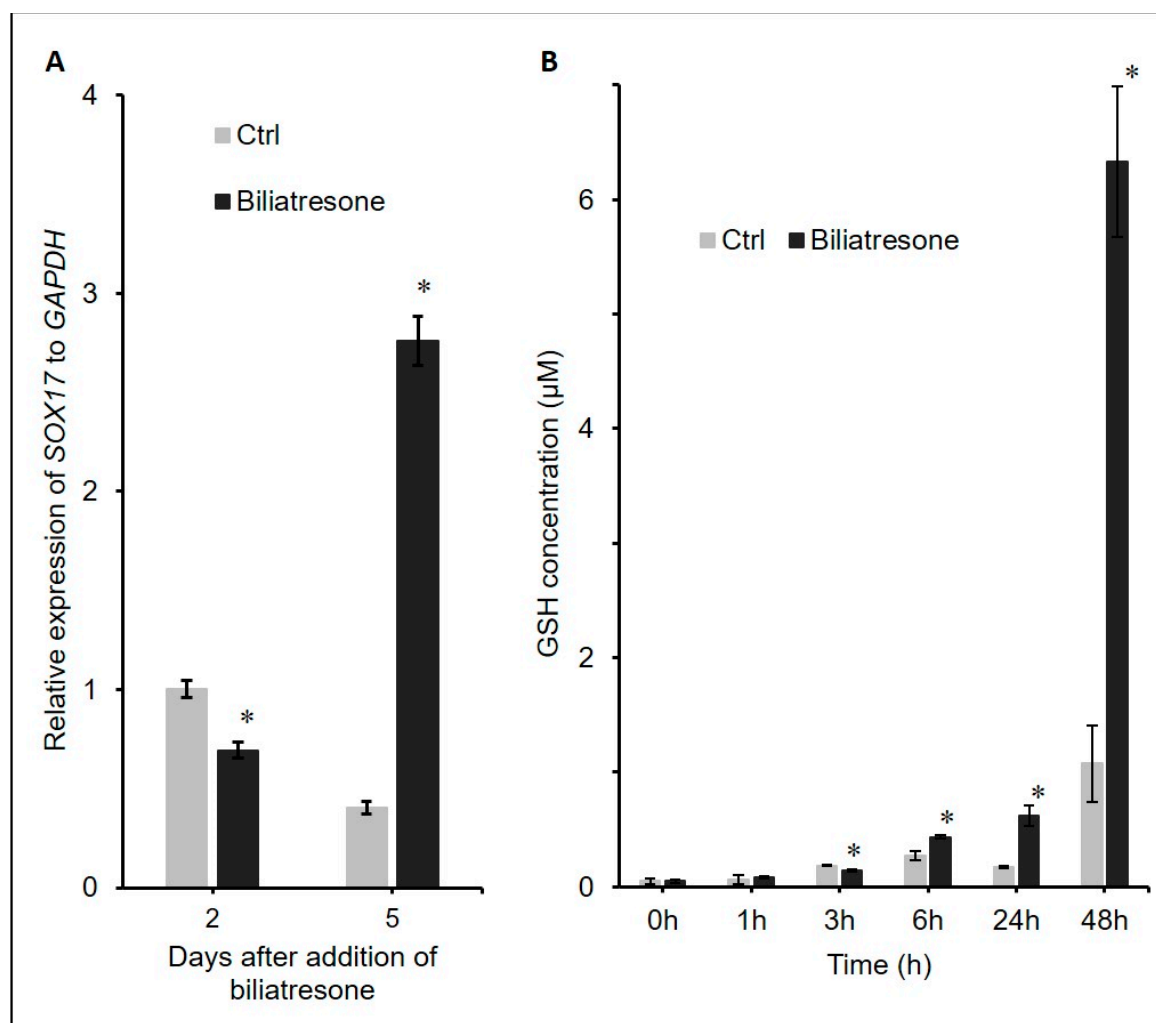

**Figure S3**

**Figure S3.** Gene expressions in liver ductal organoids with or without bilitresone treatment for 2 day and 5 days. (A) mRNA expression levels were characterized by real-time PCR for *SOX17* normalized to *GAPDH*. (B) GSH levels were measured in liver organoids from 0 to 48 hours without (Ctrl) or with bilitresone. Data was obtained from 3 wells in each group; \*,  $p < 0.05$ , student's t-test; error bars indicated the standard deviation.

**Table S1.** Patient information.

| Diagnosis | Age    | Gender | Clinical Summary                                               |
|-----------|--------|--------|----------------------------------------------------------------|
| HB        | 8 mth  | F      | Partial hepatectomy, uneventful recovery                       |
|           | 15 mth | M      | Partial hepatectomy, uneventful recovery                       |
|           | 24 mth | F      | Partial hepatectomy, uneventful recovery                       |
| CC        | 86 d   | M      | Excision of extrahepatic choledochal cyst, uneventful recovery |
|           | 7 mth  | F      | Excision of extrahepatic choledochal cyst, uneventful recovery |
|           | 29 mth | F      | Excision of extrahepatic choledochal cyst, uneventful recovery |
|           | 34 mth | M      | Excision of extrahepatic choledochal cyst, uneventful recovery |

**Movie S1:**

([https://hkuhk-my.sharepoint.com/:v/g/personal/vchlui\\_hku\\_hk/EZO6Z1DLtdpLnIZAV6993xUB0aywDBZjCsbSPUs6GfPuQg?e=alogxf](https://hkuhk-my.sharepoint.com/:v/g/personal/vchlui_hku_hk/EZO6Z1DLtdpLnIZAV6993xUB0aywDBZjCsbSPUs6GfPuQg?e=alogxf) ).
